# Supplementary material for: Longitudinal Associations Between Cognitive Deficits in Childhood and Psychopathological Symptoms in Adolescence and Young Adulthood
Source: PubMed Central journal article supplement (PMC8027911; doi:10.1001/jamanetworkopen.2021.4724), 2021-04-07

## Supplemental Online Content

Morales-Muñoz I, Upthegrove R, Mallikarjun PK, Broome MR, Marwaha S. Longitudinal associations between cognitive deficits in childhood and psychopathological symptoms in adolescence and young adulthood. *JAMA Netw Open*. 2021;4(4):e214724. doi:10.1001/jamanetworkopen.2021.4724

**eAppendix.** Further Details of Avon Longitudinal Study of Parents and Children Cohort

**eTable 1.** Differences in Sociodemographic and Clinical Variables Between Nonparticipants and Participants, Ages 11 to 12 Years and 17 to 18 Years

**eTable 2.** Differences in Sociodemographic and Clinical Variables Between Nonparticipants and Participants, Ages 22 to 24 Years

**eTable 3.** Symptoms of Greatest Relevance for Borderline Personality Disorder, Psychosis, and Hypomania

**eTable 4.** Descriptive Values of Cognitive Measures in Psychopathological Outcomes

**eTable 5.** Associations Between Dependent Variables in Path Analysis

**eTable 6.** Significant Direct Associations Between Covariates and Dependent Variables in Path Analyses

**eFigure.** Flowchart of Avon Longitudinal Study of Parents and Children Study Participants

This supplemental material has been provided by the authors to give readers additional information about their work.

**eAppendix.** Further Details of Avon Longitudinal Study of Parents and Children Cohort

The initial number of pregnancies enrolled was 14541 (for these at least one questionnaire was returned or a “Children in Focus” clinic had been attended by 19/07/99). Of these initial pregnancies, there was a total of 14676 fetuses, resulting in 14062 live births and 13988 children who were alive at 1 year of age. When the oldest children were approximately 7 years of age, an attempt was made to bolster the initial sample with eligible cases who had failed to join the study originally. As a result, in our study, as some variables were collected from the age of seven onwards there were data available for more than the 14541 pregnancies mentioned above.

**eTable 1.** Differences in Sociodemographic and Clinical Variables Between Nonparticipants and Participants, Ages 11 to 12 Years and 17 to 18 Years

| <b>11-12 years old time point</b> |                                             |             |                                         |             |                                               |          |                                    |
|-----------------------------------|---------------------------------------------|-------------|-----------------------------------------|-------------|-----------------------------------------------|----------|------------------------------------|
|                                   | <b>Non-participating group in the study</b> |             | <b>Participating group in the study</b> |             | <b>Non-participants vs participants</b>       |          |                                    |
|                                   | <i>Mean</i>                                 | <i>SD</i>   | <i>Mean</i>                             | <i>SD</i>   | <i>OR (95% CI)</i>                            | <i>p</i> | <i>t-test (t)</i>                  |
| Gestational age (in weeks)        | 37.61                                       | 6.91        | 39.44                                   | 1.85        | 0.99 (0.97, 1.02)                             | 0.760    | 20.09                              |
| Family Adversity score            | 5.01                                        | 4.64        | 3.82                                    | 3.92        | 0.95 (0.94, 0.96)                             | <0.001   | -14.08                             |
| Emotional Temperament score       | 39.78                                       | 8.67        | 39.19                                   | 8.29        | 0.99 (0.99, 1.03)                             | 0.328    | -3.647                             |
|                                   | <b>Non-participating group in the study</b> |             | <b>Participating group in the study</b> |             | <i>OR (95% CI)</i>                            | <i>p</i> | <i>Chi-squared (X<sup>2</sup>)</i> |
|                                   | <i>N</i>                                    | <i>%</i>    | <i>N</i>                                | <i>%</i>    |                                               |          |                                    |
| Sex (Male / Female)               | 4645 / 4075                                 | 53.3 / 46.7 | 3053 / 3274                             | 48.3 / 51.7 | 1.37 (1.24, 1.51)                             | <0.001   | 36.90                              |
| Being bullied (Yes / No)          | 592 / 2567                                  | 18.7 / 81.3 | 840 / 4132                              | 16.9 / 83.1 | 0.97 (0.85, 1.10)                             | 0.646    | 4.53                               |
| Childhood abuse (Yes / No)        | 563 / 5444                                  | 9.4 / 90.6  | 654 / 5192                              | 11.2 / 88.8 | 1.26 (1.08, 1.48)                             | 0.004    | 10.59                              |
| <b>17-18 years old time point</b> |                                             |             |                                         |             |                                               |          |                                    |
|                                   | <b>Non-participating group in the study</b> |             | <b>Participating group in the study</b> |             | <b>Non-participating versus participating</b> |          |                                    |
|                                   | <i>Mean</i>                                 | <i>SD</i>   | <i>Mean</i>                             | <i>SD</i>   | <i>OR (95% CI)</i>                            | <i>p</i> | <i>t-test (t)</i>                  |
| Gestational age (in weeks)        | 37.90                                       | 6.42        | 39.43                                   | 1.85        | 0.98 (0.95, 1.03)                             | 0.083    | 15.59                              |
| Family Adversity score            | 4.83                                        | 4.52        | 3.68                                    | 3.87        | 0.95 (0.93, 0.96)                             | <0.001   | -13.27                             |
| Emotional Temperament score       | 39.68                                       | 8.50        | 39.14                                   | 8.42        | 0.99 (0.99, 1.03)                             | 0.321    | -3.19                              |
|                                   | <b>Non-participating group in the study</b> |             | <b>Participating group in the study</b> |             | <i>OR (95% CI)</i>                            | <i>p</i> | <i>Chi-squared (X<sup>2</sup>)</i> |
|                                   | <i>N</i>                                    | <i>%</i>    | <i>N</i>                                | <i>%</i>    |                                               |          |                                    |
| Sex (Male / Female)               | 5587 / 4558                                 | 55.1 / 44.9 | 2111 / 2791                             | 43.1 / 56.9 | 1.72 (1.57, 1.89)                             | <0.001   | 190.71                             |
| Being bullied (Yes / No)          | 812 / 3667                                  | 18.1 / 81.9 | 620 / 3032                              | 17.0 / 83.0 | 1.04 (0.92, 1.18)                             | 0.525    | 1.84                               |
| Childhood abuse (Yes / No)        | 743 / 6830                                  | 9.8 / 90.2  | 474 / 3806                              | 11.1 / 88.9 | 1.25 (1.07, 1.46)                             | 0.004    | 4.74                               |

**eTable 2.** Differences in Sociodemographic and Clinical Variables Between Nonparticipants and Participants, Ages 22 to 24 Years

| <b>22-23 years old time point</b> |                                             |             |                                         |             |                                               |          |                                    |
|-----------------------------------|---------------------------------------------|-------------|-----------------------------------------|-------------|-----------------------------------------------|----------|------------------------------------|
|                                   | <b>Non-participating group in the study</b> |             | <b>Participating group in the study</b> |             | <b>Non-participating versus participating</b> |          |                                    |
|                                   | <i>Mean</i>                                 | <i>SD</i>   | <i>Mean</i>                             | <i>SD</i>   | <i>OR (95% CI)</i>                            | <i>p</i> | <i>t-test (t)</i>                  |
| Gestational age (in weeks)        | 38.10                                       | 6.02        | 39.50                                   | 1.80        | 1.02 (0.99, 1.05)                             | 0.147    | 12.18                              |
| Family Adversity score            | 4.71                                        | 4.49        | 3.40                                    | 3.57        | 0.93 (0.91, 0.94)                             | <0.001   | -13.53                             |
| Emotional Temperament score       | 39.57                                       | 8.51        | 39.19                                   | 8.37        | 1.00 (0.99, 1.01)                             | 0.728    | -1.97                              |
|                                   | <b>Non-participating group in the study</b> |             | <b>Participating group in the study</b> |             | <b>Non-participating versus participating</b> |          |                                    |
|                                   | <i>N</i>                                    | <i>%</i>    | <i>N</i>                                | <i>%</i>    | <i>OR (95% CI)</i>                            | <i>p</i> | <i>Chi-squared (X<sup>2</sup>)</i> |
| Sex (Male / Female)               | 6668 / 5458                                 | 55.0 / 45.0 | 1030 / 1891                             | 35.3 / 64.7 | 2.38 (2.15, 2.64)                             | <0.001   | 366.63                             |
| Being bullied (Yes / No)          | 1058 / 4702                                 | 18.4 / 81.6 | 374 / 1997                              | 15.8 / 84.2 | 1.05 (0.92, 1.21)                             | 0.453    | 0.01                               |
| Childhood abuse (Yes / No)        | 836 / 8292                                  | 9.1 / 90.9  | 281 / 2444                              | 10.3 / 89.7 | 1.23 (1.04, 1.34)                             | 0.044    | 7.79                               |

**eTable 3.** Symptoms of Greatest Relevance for Borderline Personality Disorder, Psychosis, and Hypomania

| <b>Psychopathological measure</b> | <b>Rank of symptoms (first, second, third)</b> | <b>N (%)</b> |
|-----------------------------------|------------------------------------------------|--------------|
| Borderline Personality Disorder   | 1. Anger symptom                               | 1557 (24.3)  |
|                                   | 1. Impulsivity symptom                         | 1437 (22.6)  |
|                                   | 2. Affective instability symptom               | 1301 (20.3)  |
| Psychosis                         | 1. Auditory hallucinations                     | 145 (2.9)    |
|                                   | 2. Visual hallucinations                       | 112 (2.3)    |
|                                   | 3. Delusions of being spied on                 | 26 (0.5)     |
| Hypomania                         | 1. Needs less sleep when in “high” state       | 2811 (83.4)  |
|                                   | 2. Feels more energetic when in “high” state   | 2695 (80.0)  |
|                                   | 3. Talks more when in “high state”             | 2705 (80.5)  |

**eTable 4.** Descriptive Values of Cognitive Measures in Psychopathological Outcomes

|                              | BPD 11-12 years |                 |                 | Psychosis 17-18 years |                 |                 | Depression 17-18 years |                 |                  | Hypomania 21-23 years |                 |                 |
|------------------------------|-----------------|-----------------|-----------------|-----------------------|-----------------|-----------------|------------------------|-----------------|------------------|-----------------------|-----------------|-----------------|
|                              | Yes             | No              | t-test,<br>p    | Yes                   | No              | t-test,<br>p    | Yes                    | No              | t-test,<br>p     | Yes                   | No              | t-test,<br>p    |
|                              | Mean<br>(SD)    | Mean<br>(SD)    |                 | Mean<br>(SD)          | Mean<br>(SD)    |                 | Mean<br>(SD)           | Mean<br>(SD)    |                  | Mean<br>(SD)          | Mean<br>(SD)    |                 |
| Selective attention, 8 years | 8.62<br>(2.24)  | 8.80<br>(2.28)  | -1.46,<br>0.761 | 8.50<br>(8.87)        | 8.87<br>(2.28)  | -2.03,<br>0.868 | 8.69<br>(2.27)         | 8.88<br>(2.28)  | -1.67,<br>0.729  | 8.94<br>(2.29)        | 9.09<br>(2.62)  | 0.58,<br>0.166  |
| Sustained attention, 8 years | 7.06<br>(3.75)  | 7.76<br>(3.70)  | -3.47,<br>0.084 | 7.49<br>(3.93)        | 7.81<br>(3.63)  | -1.06,<br>0.202 | 7.20<br>(3.63)         | 7.88<br>(3.64)  | -3.61,<br>0.351  | 7.49<br>(3.68)        | 7.71<br>(3.58)  | -0.53,<br>0.402 |
| Attentional control, 8 years | 18.17<br>(1.75) | 18.35<br>(1.53) | -2.09,<br>0.009 | 18.17<br>(1.70)       | 18.36<br>(1.55) | -1.50,<br>0.105 | 18.24<br>(1.65)        | 18.40<br>(1.45) | -2.18,<br><0.001 | 18.38<br>(1.59)       | 18.45<br>(1.42) | -0.38,<br>0.293 |
| Working memory, 10 years     | 3.33<br>(0.86)  | 3.44<br>(0.83)  | -2.54,<br>0.155 | 3.34<br>(0.93)        | 3.47<br>(0.85)  | -1.81,<br>0.056 | 3.44<br>(0.81)         | 3.47<br>(0.85)  | -0.60,<br>0.579  | 3.31<br>(0.93)        | 3.50<br>(0.83)  | -1.91,<br>0.056 |
| Inhibitory control, 10 years | 11.82<br>(3.27) | 12.09<br>(3.05) | -1.68,<br>0.037 | 11.60<br>(3.25)       | 12.06<br>(3.04) | -1.91,<br>0.112 | 12.19<br>(3.04)        | 12.03<br>(3.06) | 1.05,<br>0.670   | 12.14<br>(2.99)       | 12.38<br>(2.84) | 0.69,<br>0.687  |

BPD=Borderline personality disorder

**eTable 5.** Associations Between Dependent Variables in Path Analysis

BPD=Borderline personality disorder

| Dependent variables                  | BPD symptoms at 11-12 years |     | Psychotic experiences at 17-18 years |        | Depression at 17-18 years |        | Hypomania at 22-23 years |        |
|--------------------------------------|-----------------------------|-----|--------------------------------------|--------|---------------------------|--------|--------------------------|--------|
|                                      | $\beta$                     | p   | $\beta$                              | p      | $\beta$                   | p      | $\beta$                  | p      |
| BPD symptoms at 11-12 years          | -----                       | --- | 0.06                                 | <0.001 | 0.07                      | <0.001 | 0.07                     | <0.001 |
| Psychotic experiences at 17-18 years |                             |     | -----                                | ---    | 0.15                      | <0.001 | 0.07                     | <0.001 |
| Depression at 17-18 years            |                             |     |                                      |        | -----                     | ---    | 0.03                     | 0.020  |

**eTable 6.** Significant Direct Associations Between Covariates and Dependent Variables in Path Analyses

|                              | <b>BPD at 11-12y</b> |        | <b>Psychosis at 17-18y</b> |        | <b>Depression at 17-18y</b> |        | <b>Hypomania at 21-23y</b> |        |
|------------------------------|----------------------|--------|----------------------------|--------|-----------------------------|--------|----------------------------|--------|
|                              | $\beta$              | p      | $\beta$                    | p      | $\beta$                     | p      | $\beta$                    | p      |
| <b>Sex</b>                   | -----                | -----  | 0.02                       | <0.001 | 0.08                        | <0.001 | -0.01                      | 0.036  |
| <b>FAI</b>                   | 0.05                 | <0.001 | 0.03                       | <0.001 | 0.08                        | <0.001 | -----                      | -----  |
| <b>Gestational age</b>       |                      |        | -0.04                      | <0.001 | -----                       | -----  | 0.03                       | <0.001 |
| <b>Emotional temperament</b> | 0.01                 | 0.045  | -----                      | -----  | -----                       | -----  | -----                      | -----  |
| <b>Bullying</b>              | 0.05                 | <0.001 | 0.02                       | 0.016  | -----                       | -----  | -----                      | -----  |



**eFigure.** Flowchart of Avon Longitudinal Study of Parents and Children Study Participants

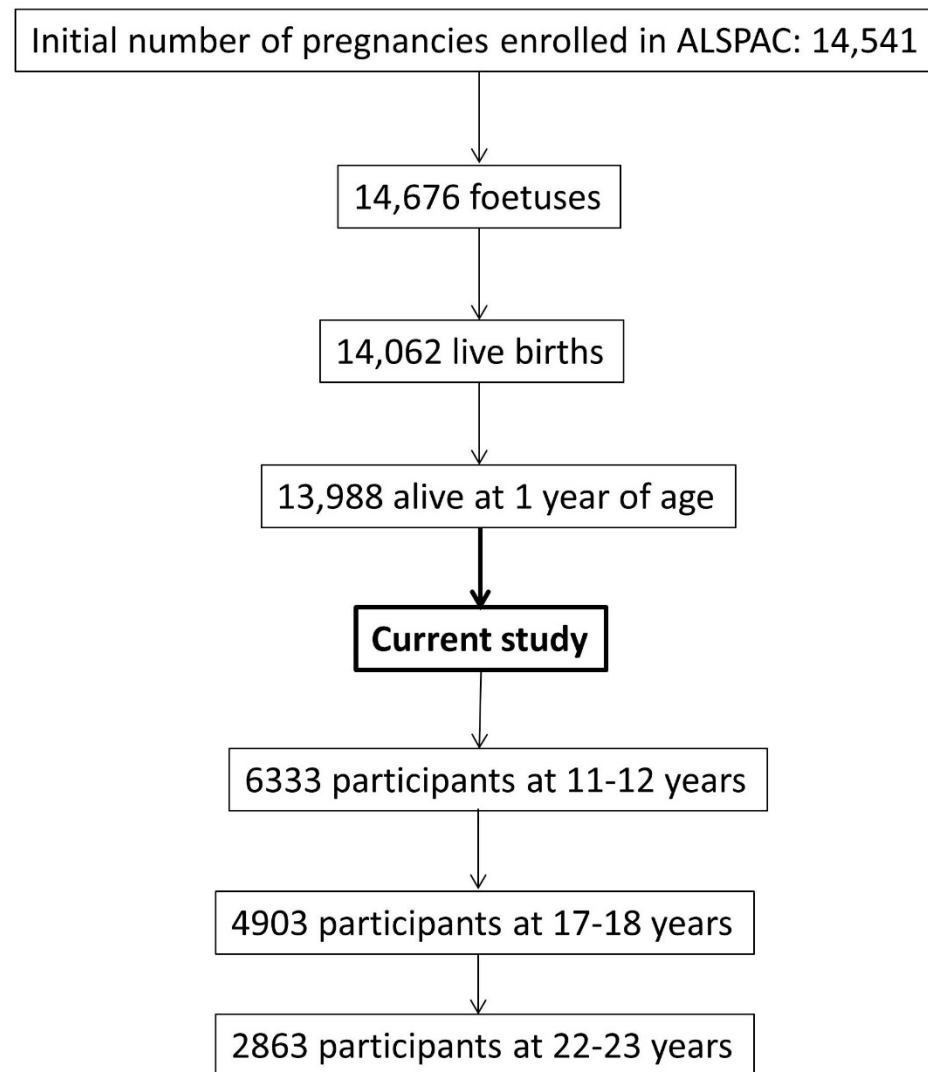

Supplement: jamanetwopen-e214724-s001.pdf [file jamanetwopen-e214724-s001.pdf]
